# Supplementary material
Source: PubMed Central journal article supplement (PMC8024352)
Supplement: Supp_Fig1-Table1.pdf [file Supp_Fig1-Table1.pdf]

## Supplementary Data

SUPPLEMENTARY TABLE S1. CHILD, FAMILY, AND INJURY CHARACTERISTICS BY FOLLOW-UP COMPLETION

|                                                   | <i>Completed follow-up</i><br>n = 376 | <i>No follow-up</i><br>n = 57 | p value |
|---------------------------------------------------|---------------------------------------|-------------------------------|---------|
| <b>Child and family characteristics</b>           |                                       |                               |         |
| Age at injury                                     |                                       |                               | 0.06    |
| 31 months to 5 years                              | 120 (32%)                             | 26 (46%)                      |         |
| 6–11 years                                        | 133 (35%)                             | 12 (21%)                      |         |
| 12–15 years                                       | 123 (33%)                             | 19 (33%)                      |         |
| Child sex: Female                                 | 135 (36%)                             | 18 (32%)                      | 0.52    |
| Child race/ethnicity                              |                                       |                               | 0.01    |
| Hispanic or Latino                                | 93 (25%)                              | 22 (40%)                      |         |
| White, non-Hispanic                               | 226 (61%)                             | 21 (38%)                      |         |
| Black, non-Hispanic                               | 28 (8%)                               | 6 (11%)                       |         |
| Other, non-Hispanic                               | 25 (7%)                               | 6 (11%)                       |         |
| Insurance type                                    |                                       |                               | 0.01    |
| None                                              | 35 (9%)                               | 13 (23%)                      |         |
| Medicaid/CHIP                                     | 137 (37%)                             | 20 (35%)                      |         |
| Commercial/Private/Military                       | 203 (54%)                             | 24 (42%)                      |         |
| Income at or below poverty level                  | 90 (26%)                              | 18 (37%)                      | 0.12    |
| Problematic family functioning                    | 50 (13%)                              | 11 (19%)                      | 0.23    |
| Social capital index: mean (SD)                   | 3.5 (1.0)                             | 2.9 (1.1)                     | <0.001  |
| <b>Latent class indicators of injury severity</b> |                                       |                               |         |
| Loss of consciousness pre-hospital                | 188 (54%)                             | 26 (50%)                      | 0.56    |
| Hypotension in ED                                 | 13 (3%)                               | 2 (4%)                        | 1.0     |
| ED GCS Total                                      |                                       |                               | 0.51    |
| 3-8                                               | 89 (24%)                              | 10 (18%)                      |         |
| 9-12                                              | 24 (6%)                               | 5 (9%)                        |         |
| 13-15                                             | 263 (70%)                             | 42 (74%)                      |         |
| Hours to Motor GCS of 6                           |                                       |                               | 0.24    |
| <12                                               | 324 (86%)                             | 50 (88%)                      |         |
| 12-<24                                            | 14 (4%)                               | 1 (2%)                        |         |
| 24-<48                                            | 6 (2%)                                | 3 (5%)                        |         |
| ≥ 48                                              | 32 (9%)                               | 3 (5%)                        |         |
| Head AIS                                          |                                       |                               | 0.50    |
| 0-2                                               | 135 (36%)                             | 23 (40%)                      |         |
| 3-4                                               | 213 (57%)                             | 32 (56%)                      |         |
| 5-6                                               | 28 (7%)                               | 2 (4%)                        |         |
| Rotterdam score 3-6                               | 114 (31%)                             | 14 (25%)                      | 0.35    |

SD, standard deviation; ED, emergency department; GCS, Glasgow Coma Scale; AIS, Abbreviated Injury Scale.

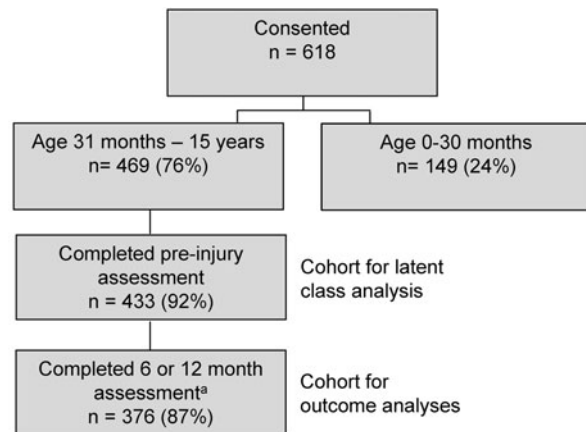

\* Of 376 completing follow up, 27 (7%) completed a 6 month assessment only, 7 (2%) completed a 12 month assessment only, and 342 (91%) completed both assessments.

SUPPLEMENTARY FIG. S1. Cohort flow diagram.
