# Supplementary material
Source: PubMed Central journal article supplement (PMC8024352)
Supplement: Supp_Tables2-4.pdf [file Supp_Tables2-4.pdf]

SUPPLEMENTARY TABLE S2. MEAN OUTCOMES BY LATENT CLASS AND ORIGINAL SEVERITY, MEAN (SD)

|                                              | <i>Latent class (LC)</i> |                |               |               | <i>Original severity</i> |                |                 |               |
|----------------------------------------------|--------------------------|----------------|---------------|---------------|--------------------------|----------------|-----------------|---------------|
|                                              | <i>LC 1</i>              | <i>LC 2</i>    | <i>LC 3</i>   | <i>LC 4</i>   | <i>Mild</i>              | <i>cMild</i>   | <i>Moderate</i> | <i>Severe</i> |
| 6 month outcome, <i>n</i> = 369              | <i>n</i> = 125           | <i>n</i> = 139 | <i>n</i> = 62 | <i>n</i> = 43 | <i>n</i> = 136           | <i>n</i> = 122 | <i>n</i> = 24   | <i>n</i> = 87 |
| PIFOS Total                                  | 26.9 (4.9)               | 29.2 (6.9)     | 30.9 (7.7)    | 38.1 (13.7)   | 28.1 (6.3)               | 28.2 (6.0)     | 32.3 (8.1)      | 33.9 (11.6)   |
| 12 month outcomes, <i>n</i> = 349            | <i>n</i> = 117           | <i>n</i> = 135 | <i>n</i> = 57 | <i>n</i> = 40 | <i>n</i> = 129           | <i>n</i> = 117 | <i>n</i> = 21   | <i>n</i> = 82 |
| PIFOS Total                                  | 27.5 (7.1)               | 28.0 (6.4)     | 30.6 (8.5)    | 35.4 (10.8)   | 27.7 (6.6)               | 27.9 (7.0)     | 31.8 (6.8)      | 32.4 (10.2)   |
| BRIEF Working Memory T-score <sup>a</sup>    | 0.16 (11.1)              | 2.85 (11.8)    | 2.74 (11.9)   | 8.93 (13.0)   | 0.39 (12.1)              | 2.81 (10.7)    | 3.19 (11.9)     | 5.71 (12.9)   |
| BRIEF Emotional Control T-score <sup>a</sup> | 0.12 (12.1)              | 3.51 (12.6)    | 4.33 (11.6)   | 7.79 (12.1)   | 0.99 (12.3)              | 2.49 (12.6)    | 7.24 (11.6)     | 5.77 (11.8)   |

<sup>a</sup>BRIEF scores reflect change from pre-injury to 12 month follow-up.

SD, standard deviation; cMild, complicated Mild; PIFOS, Pediatric Injury Functional Outcome Scale; BRIEF, Behavior Rating Inventory of Executive Function.

SUPPLEMENTARY TABLE S3. MEAN OUTCOMES BY AIS, MEAN (SD)

|                                              | <i>Abbreviated Injury Score (AIS)</i> |                |               |
|----------------------------------------------|---------------------------------------|----------------|---------------|
|                                              | <i>0-2</i>                            | <i>3-4</i>     | <i>5-6</i>    |
| 6 month outcome, <i>n</i> = 369              | <i>n</i> = 132                        | <i>n</i> = 209 | <i>n</i> = 28 |
| PIFOS total                                  | 27.3 (5.7)                            | 30.3 (8.2)     | 36.8 (13.2)   |
| 12 month outcomes, <i>n</i> = 349            | <i>n</i> = 123                        | <i>n</i> = 199 | <i>n</i> = 27 |
| PIFOS total                                  | 27.8 (7.6)                            | 29.3 (7.8)     | 33.6 (9.4)    |
| BRIEF Working Memory T-score <sup>a</sup>    | 0.50 (11.1)                           | 3.68 (12.4)    | 4.56 (11.0)   |
| BRIEF Emotional Control T-score <sup>a</sup> | 0.19 (11.9)                           | 4.51 (12.2)    | 4.63 (13.7)   |

<sup>a</sup>BRIEF scores reflect change from pre-injury to 12 month follow-up

SD, standard deviation; PIFOS, Pediatric Injury Functional Outcome Scale; BRIEF, Behavior Rating Inventory of Executive Function.

SUPPLEMENTARY TABLE S4. AKAIKE INFORMATION CRITERION (AIC) FOR VARIOUS SEVERITY MEASURES<sup>a</sup>

| <i>Outcomes</i>                              | <i>Severity measure defined by</i> |            |            |
|----------------------------------------------|------------------------------------|------------|------------|
|                                              | <i>Latent classes</i>              | <i>GCS</i> | <i>AIS</i> |
| PIFOS total - 6 months                       | 2460                               | 2512       | 2531       |
| PIFOS total - 12 months                      | 2382                               | 2392       | 2426       |
| BRIEF Working Memory T-score <sup>b</sup>    | 2681                               | 2687       | 2694       |
| BRIEF Emotional Control T-score <sup>b</sup> | 2701                               | 2704       | 2708       |

<sup>a</sup>AIC is a measure of model fit; lower values reflect better model fit.

<sup>b</sup>BRIEF scores reflect change from pre-injury to 12 month follow-up.

GCS, Glasgow Coma Scale; PIFOS, Pediatric Injury Functional Outcome Scale; BRIEF, Behavior Rating Inventory of Executive Function.
